# Supplementary material for: Comparative analysis of four Zantedeschia chloroplast genomes: expansion and contraction of the IR region, phylogenetic analyses and SSR genetic diversity assessment
Source: PeerJ journal article supplement (doi:10.7717/peerj.9132), 2020-05-22
Supplement: Table_S1.pdf [file Table_S1.pdf]

1 Table S1 The genes which contain introns in four *Zantedeschia* species.

| Gene  | Location | Exon1(bp)     |              |               |              | Intron1(bp)   |              |               |              | Exon2(bp)     |              |               |              | Intron2(bp)   |              |               |              | Exon3(bp)     |              |               |              |
|-------|----------|---------------|--------------|---------------|--------------|---------------|--------------|---------------|--------------|---------------|--------------|---------------|--------------|---------------|--------------|---------------|--------------|---------------|--------------|---------------|--------------|
|       |          | <i>Z. reh</i> | <i>Z.odo</i> | <i>Z. ell</i> | <i>Z.aet</i> | <i>Z. reh</i> | <i>Z.odo</i> | <i>Z. ell</i> | <i>Z.aet</i> | <i>Z. reh</i> | <i>Z.odo</i> | <i>Z. ell</i> | <i>Z.aet</i> | <i>Z. reh</i> | <i>Z.odo</i> | <i>Z. ell</i> | <i>Z.aet</i> | <i>Z. reh</i> | <i>Z.odo</i> | <i>Z. ell</i> | <i>Z.aet</i> |
| atpF  | LSC      | 401           | 402          | 401           | 401          | 844           | 897          | 844           | 862          | 145           | 145          | 145           | 145          | /             | /            | /             | /            | /             | /            | /             | /            |
| clpP  | LSC      |               | 1277         | /             | 1274         | /             | 836          | /             | 849          |               | 71           | /             | 36           | /             | 795          | /             | 653          | /             | 1348         | /             | 36           |
| ndhA  | LSC      | 553           | 553          | 553           | 539          | 1077          | 655          | 1077          | 1084         | 539           | 539          | 539           | 553          | /             | /            | /             | /            | /             | /            | /             | /            |
| ndhB  | LSC      | 777           | 756          | 756           | 777          | 661           | 1080         | 661           | 678          | 756           | 779          | 777           | 756          | /             | /            | /             | /            | /             | /            | /             | /            |
| petB  | LSC      | 6             | 6            | 6             | 6            | 56            | 678          | 54            | 56           | 642           | 642          | 642           | 642          | /             | /            | /             | /            | /             | /            | /             | /            |
| petD  | LSC      | 8             | 8            | 8             | 8            | 733           | 802          | 733           | 719          | 475           | 475          | 475           | 470          | /             | /            | /             | /            | /             | /            | /             | /            |
| rpl16 | LSC      | 399           | 399          | 399           | 399          | 1020          | 724          | 1008          | 1116         | 9             | 9            | 9             | 9            | /             | /            | /             | /            | /             | /            | /             | /            |
| rpl2  | LSC      | 428           | 370          | 428           | 382          | 666           | 661          | 666           | 661          | 376           | 429          | 376           | 434          | /             | /            | /             | /            | /             | /            | /             | /            |
| rpoC1 | LSC      | 1629          | 1620         | 1629          | 1620         | 737           | 743          | 735           | 742          | 459           | 432          | 459           | 453          | /             | /            | /             | /            | /             | /            | /             | /            |
| rps16 | IR       | 197           | 197          | 197           | 197          | 1161          | 1370         | 1180          | 1226         | 40            | 40           | 40            | 40           | /             | /            | /             | /            | /             | /            | /             | /            |
| rps18 | IR       | 24            | /            | 24            | 23           | 147           | /            | 219           | 30           | 282           | /            | 282           | 295          | /             | /            | /             | /            | /             | /            | /             | /            |
| ycf3  | IR       | 1178          | 1138         | 1178          | 1148         | 708           | 746          | 710           | 748          | 124           | 124          | 124           | 124          | 795           | 755          | 795           | 765          | 124           | 124          | 124           | 1102         |
| ycf68 | IR       | 303           | /            | 42            | 294          | 33            | /            | 31            | 31           | 42            | /            | 303           | 294          | /             | /            | /             | /            | /             | /            | /             | /            |

2
